# Supplementary material for: The impact of COVID-19 on medication reviews in English primary care. An OpenSAFELY-TPP analysis of 20 million adult electronic health records
Source: bioRxiv or medRxiv preprint supplement (doi:10.1101/2023.07.31.23293419), 2023-10-03
Supplement: Supplementary file [file media-1.pdf]

## Supplementary material

(a)

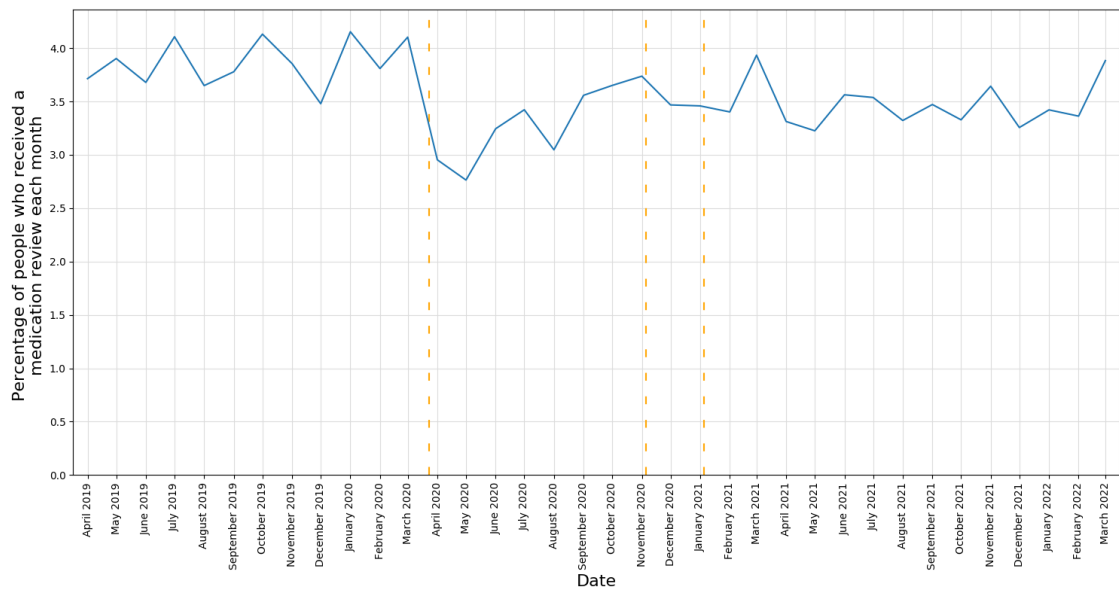

(b)

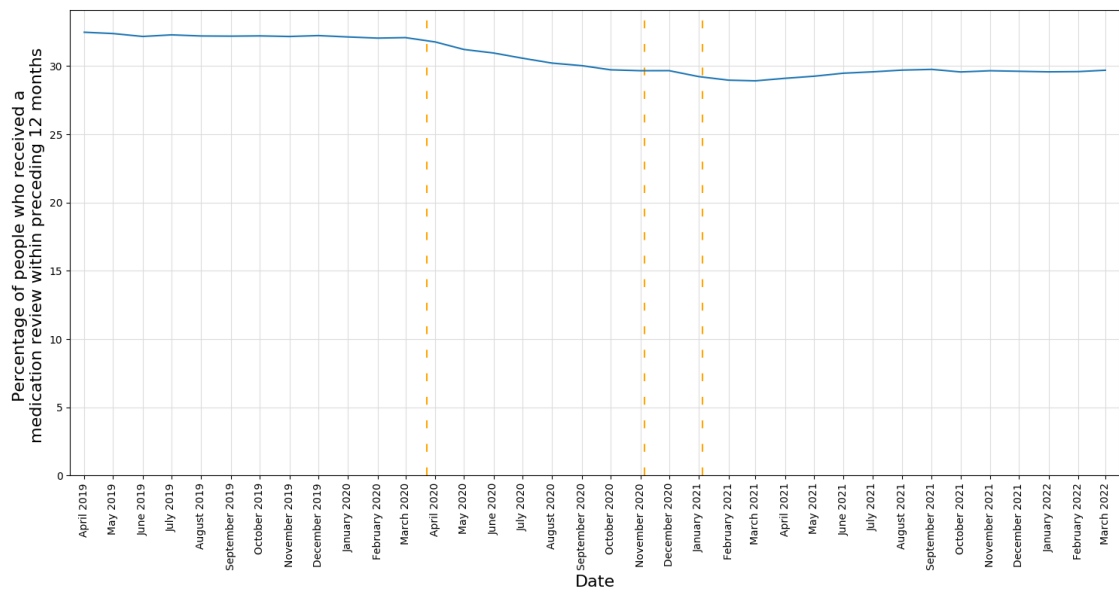

**Figure S1. Monthly reported results for the period April 2019 to March 2022 (inclusive) of a) The percentage of patients that had had a medication review in the reported month b) The percentage of patients that had had a medication review in the previous 12 months. Vertical dashed lines represent the start of three lockdown periods (23rd March 2020, 5th November 2020, 5th January 2021).**

**Table S1. Summary of high risk drug subgroups and codelists.**

| High risk drug subgroup          | Drug class                                                                                                                                                    | Codelist                                                                                                                                        |
|----------------------------------|---------------------------------------------------------------------------------------------------------------------------------------------------------------|-------------------------------------------------------------------------------------------------------------------------------------------------|
| Potentially addictive medication | High dose long acting opioids<br><br>Z-drugs (zopiclone/zolpidem)<br>Gabapentinoids<br>Benzodiazepines                                                        | <a href="#">OpenCodelists: High dose long acting opioids (OpenPrescribing) - dm+d</a><br><br><a href="#">OpenCodelists: Addictive medicines</a> |
| DMARDs                           | Azathioprine<br>Mercaptopurine<br>Sulfasalazine<br>Hydroxychloroquine<br>Ciclosporin<br>Methotrexate<br>Penicillamine<br>Leflunomide<br>Mycophenolate mofetil | <a href="#">OpenCodelists: DMARDs</a>                                                                                                           |
| Teratogenic medications          | Carbimazole<br>Sodium Valproate / Valproic acid<br>Pregabalin<br>Modafinil<br>Topiramate                                                                      | <a href="#">OpenCodelists: Teratogenic medicines</a>                                                                                            |

**Table S2. Percentage of patients with a medication review coded in the previous 12 months for key demographic, regional and clinical groups.**

|                                                | April 2019 | March 2021 |            | March 2022 |            |
|------------------------------------------------|------------|------------|------------|------------|------------|
|                                                | Crude (%)  | Crude (%)  | Change (%) | Crude (%)  | Change (%) |
| <b>Total</b>                                   | 32.3       | 28.8       | -10.8      | 29.6       | -8.4       |
| <b>Sex</b>                                     |            |            |            |            |            |
| Female                                         | 36.1       | 32.5       | -10.0      | 33.4       | -7.5       |
| Male                                           | 28.4       | 25.1       | -11.6      | 25.8       | -9.2       |
| <b>Age band</b>                                |            |            |            |            |            |
| 18-29                                          | 13.3       | 12.6       | -5.3       | 12.6       | -5.3       |
| 30-39                                          | 15.8       | 14.9       | -5.7       | 15.1       | -4.4       |
| 40-49                                          | 23.6       | 21.1       | -10.6      | 21.3       | -9.7       |
| 50-59                                          | 33.7       | 30.1       | -10.7      | 31.2       | -7.4       |
| 60-69                                          | 48.2       | 41.5       | -13.9      | 42.8       | -11.2      |
| 70-79                                          | 61.8       | 53.6       | -13.3      | 55.6       | -10.0      |
| 80-89                                          | 69.4       | 61.2       | -11.8      | 63.7       | -8.2       |
| 90+                                            | 70.3       | 64.2       | -8.7       | 66.8       | -5.0       |
| <b>IMD quintile</b>                            |            |            |            |            |            |
| 1 (most deprived)                              | 30.5       | 27.9       | -8.5       | 28.1       | -7.9       |
| 2                                              | 30.8       | 27.6       | -10.4      | 28.4       | -7.8       |
| 3                                              | 32.8       | 29.1       | -11.3      | 30         | -8.5       |
| 4                                              | 33.4       | 29.5       | -11.7      | 30.5       | -8.7       |
| 5 (least deprived)                             | 34         | 30.3       | -10.9      | 31.5       | -7.4       |
| Unknown                                        | 31.1       | 26.8       | -13.8      | 27.2       | -12.5      |
| <b>Region</b>                                  |            |            |            |            |            |
| East                                           | 31.7       | 28.6       | -9.8       | 29.5       | -6.9       |
| East Midlands                                  | 34.9       | 31.2       | -10.6      | 32.3       | -7.4       |
| London                                         | 17.6       | 15.3       | -13.1      | 16.3       | -7.4       |
| North East                                     | 32.8       | 30.9       | -5.8       | 31.4       | -4.3       |
| North West                                     | 37.3       | 34.5       | -7.5       | 34.7       | -7.0       |
| South East                                     | 30.8       | 26         | -15.6      | 26         | -15.6      |
| South West                                     | 34.6       | 30.8       | -11.0      | 31.7       | -8.4       |
| West Midlands                                  | 26.6       | 23.9       | -10.2      | 25.5       | -4.1       |
| Yorkshire and The Humber                       | 33.7       | 29.8       | -11.6      | 30.7       | -8.9       |
| Unknown                                        | 32.1       | 29.3       | -8.7       | 26.8       | -16.5      |
| <b>Ethnicity</b>                               |            |            |            |            |            |
| British                                        | 38.1       | 34.4       | -9.7       | 35.6       | -6.6       |
| Irish                                          | 34.4       | 30.3       | -11.9      | 31.8       | -7.6       |
| Any other White background                     | 19.4       | 16.8       | -13.4      | 17.3       | -10.8      |
| Indian                                         | 23         | 21         | -8.7       | 21.8       | -5.2       |
| Pakistani                                      | 23.9       | 22         | -7.9       | 22.7       | -5.0       |
| Bangladeshi                                    | 24.4       | 21         | -13.9      | 21.7       | -11.1      |
| Any other Asian background                     | 18.8       | 16.8       | -10.6      | 17.5       | -6.9       |
| African                                        | 16.1       | 14.7       | -8.7       | 15.2       | -5.6       |
| Caribbean                                      | 29.7       | 26.4       | -11.1      | 28.1       | -5.4       |
| Any other Black background                     | 20.8       | 18.8       | -9.6       | 19.6       | -5.8       |
| White and Asian                                | 19.7       | 18         | -8.6       | 18.7       | -5.1       |
| White and Black Caribbean                      | 23.1       | 21.9       | -5.2       | 22.4       | -3.0       |
| White and Black African                        | 18.1       | 16.5       | -8.8       | 16.8       | -7.2       |
| Any other mixed background                     | 18.6       | 17.1       | -8.1       | 17.9       | -3.8       |
| Chinese                                        | 9.8        | 7.9        | -19.4      | 8.6        | -12.2      |
| Any other ethnic group                         | 16.5       | 15         | -9.1       | 15.4       | -6.7       |
| Unknown                                        | 14         | 12.1       | -13.6      | 12.3       | -12.1      |
| <b>Record of learning disability</b>           | 55.9       | 57.4       | 2.7        | 56.6       | 1.3        |
| <b>Record of living at a care/nursing home</b> | 77.6       | 76.6       | -1.3       | 79.2       | 2.1        |
| <b>Record of prescriptions for</b>             |            |            |            |            |            |
| Potentially addictive medication               | 70.1       | 66         | -5.8       | 67.2       | -4.1       |
| DMARD                                          | 72.5       | 67.2       | -7.3       | 68         | -6.2       |
| Teratogenic medication                         | 69.1       | 65.5       | -5.2       | 65.4       | -5.4       |
| High risk medication                           | 70.1       | 65.8       | -6.1       | 66.9       | -4.6       |

Baseline April 2019, all % change calculations calculated from this data

**Table S3. Usage of all codes used to report medication review activity for patients registered at TPP practices between April 2019-March 2022**

| <b>Term and SNOMED CT code</b>                                              | <b>Uses</b> |
|-----------------------------------------------------------------------------|-------------|
| Medication review done (314530002)                                          | 21,382,570  |
| Review of medication (182836005)                                            | 1,651,115   |
| Medication review with patient (88551000000109)                             | 1,504,035   |
| Medication review done by clinical pharmacist (1127441000000107)            | 1,440,845   |
| Medication review done by pharmacist (719329004)                            | 1,322,265   |
| Structured medication review (1239511000000100)                             | 1,286,160   |
| Dispensing review of use of medicines (279681000000105)                     | 939,180     |
| Medication review of medical notes (93311000000106)                         | 884,945     |
| Asthma medication review (394720003)                                        | 844,270     |
| Medication review without patient (391156007)                               | 730,365     |
| Medicines reconciliation completed (526421000000109)                        | 550,555     |
| Synchronization of repeat medication (415693003)                            | 359,055     |
| Diabetes medication review (394725008)                                      | 355,595     |
| Polypharmacy medication review (870661000000100)                            | 325,340     |
| Medication review done by doctor (719328007)                                | 309,920     |
| Anticoagulant medication review (922731000000106)                           | 295,405     |
| Depression medication review (413974004)                                    | 253,795     |
| Medication review done by medicines management pharmacist (961831000000100) | 247,365     |
| Medication review done by pharmacy technician (719326006)                   | 203,735     |
| Medication review done by nurse (719478008)                                 | 187,455     |
| Mental health medication review (413143000)                                 | 170,000     |
| Medication review done by medicines management technician (961861000000105) | 120,775     |
| Heart failure medication review (473226007)                                 | 105,285     |
| Respiratory disease medication review (858091000000102)                     | 73,750      |
| Medication review by practice nurse (803361000000109)                       | 70,735      |
| Cardiac medication review (810241000000107)                                 | 53,535      |
| Medicines adherence checked (526431000000106)                               | 45,020      |
| Concordance and compliance level 2 medication review (712761000000103)      | 44,195      |
| Epilepsy medication review (401062003)                                      | 29,840      |

|                                                                                                                  |        |
|------------------------------------------------------------------------------------------------------------------|--------|
| Antipsychotic medication review (769063007)                                                                      | 25,565 |
| Dementia medication review (938551000000108)                                                                     | 24,325 |
| High risk drug monitoring annual review (381351000000107)                                                        | 19,765 |
| High risk drug monitoring three monthly review (381291000000107)                                                 | 17,520 |
| Dispensing review of use of medicines invitation (772741000000105)                                               | 12,880 |
| High risk drug monitoring review (381231000000106)                                                               | 11,790 |
| High risk drug monitoring monthly review (381261000000101)                                                       | 11,340 |
| Coronary heart disease medication review (394724007)                                                             | 10,185 |
| Medication review done by community pharmacist (719327002)                                                       | 5,800  |
| High risk drug monitoring six monthly review (381321000000102)                                                   | 5,225  |
| Bisphosphonate medication review (718017007)                                                                     | 3,485  |
| Medication review by community nurse (1079381000000109)                                                          | 1,600  |
| Stopping Over-Medication of People with Learning Disability, Autism or Both medication review (1106111000000108) | 1,040  |
| Osteoporosis medication compliance review (965871000000101)                                                      | 745    |
| Medicine labeling amended (395005007)                                                                            | 645    |
| Dispensing review of use of warfarin (792951000000100)                                                           | 395    |
| Annual review of lithium therapy (753951000000101)                                                               | 145    |
| Chronic obstructive lung disorder medication review (473223004)                                                  | 25     |
| High risk drug monitoring two monthly review (1103191000000105)                                                  | 15     |
| Gastrointestinal disorder medication review (473230005)                                                          | 0      |
| Cardiovascular disorder medication review (473219007)                                                            | 0      |
| Human immunodeficiency virus medication review (473233007)                                                       | 0      |
| Pain medication review (1811000124107)                                                                           | 0      |
| Pregnancy and lactation medication review (1831000124101)                                                        | 0      |
| Palliative care medication review (1841000124106)                                                                | 0      |
| Review of opioid medication (287031000000100)                                                                    | 0      |
| Infectious disease medication review (473232002)                                                                 | 0      |
| Comprehensive medication therapy review (428911000124108)                                                        | 0      |
| Hematologic disorder medication review (473220001)                                                               | 0      |
| Neurological disorder medication review (473228008)                                                              | 0      |
| Targeted medication therapy review (6021000124103)                                                               | 0      |

|                                                                                       |   |
|---------------------------------------------------------------------------------------|---|
| Pulmonary disorder medication review (473221002)                                      | 0 |
| Endocrine disorder medication review (473235000)                                      | 0 |
| Renal disorder medication review (473231009)                                          | 0 |
| Gout medication review (473224005)                                                    | 0 |
| Hypertension medication review (473225006)                                            | 0 |
| Review of international normalised ratio time in therapeutic range (1089291000000107) | 0 |
| Metabolic disorder medication review (473227003)                                      | 0 |
| Dyslipidemia medication review (473234001)                                            | 0 |
